# Supplementary material for: Multi-path charge transport in organic single crystals: a effective strategy to realizing ultra-sensitive organic ultraviolet photodetectors
Source: Research Square preprint supplement (doi:10.21203/rs.3.rs-8062468/v1), 2025-12-02
Supplement: Supplementary file 1 [file cbc2de62184236388cc23e03.pdf]

# **Multi-path charge transport in organic single crystals: a effective strategy to realizing ultra-sensitive organic ultraviolet photodetectors**

Derui Zhu<sup>1†</sup>, Hongzhuo Wu<sup>2†</sup>, Zewei Li<sup>1†</sup>, Meyang Yu<sup>1</sup>, Jingwei Tao<sup>1\*</sup>, Lijun Zhang<sup>1\*</sup>

<sup>1</sup> Key Laboratory of Automobile Materials of Ministry of Education and School of Materials Science and Engineering, Jilin University, Changchun, 130012, China

<sup>2</sup> Key Lab for Special Functional Materials of Ministry of Education, National and Local Joint Engineering Research Center for High-Efficiency Display and Lighting Technology, Collaborative Innovation Center of Nano Functional Materials and Applications, School of Nanoscience and Materials Engineering, Henan University, Kaifeng, 475004, China

†These authors contributed equally to this work.

\*Corresponding author. E-mail: taojingwei@jlu.edu.cn, lijun\_zhang@jlu.edu.cn

The temperature-dependent free-exciton emission intensities of 4,8-DTEBDT and 2,6-DTEBDT can be fitted using:

$$I(T) = I_0 / (1 + Ae^{-E_B/kT}) \quad (S1)$$

where  $I_0$ ,  $E_B$ , and  $k$  is the intensity at 0 K, the binding energy, and the Boltzmann constant, respectively.

The field effect mobility ( $\mu$ ) of BDPEBD SC-OFETs was calculated in the saturation regime by the equation:

$$I_{DS} = WC_i\mu(V_G - V_{th})^2 / 2L \quad (S2)$$

where  $I_{DS}$ ,  $W$ , and  $L$  are the drain current, the channel width, and the channel length, respectively.  $C_i$  is the capacitance of the insulation layer (300 nm SiO<sub>2</sub>, 10 nF cm<sup>-2</sup>),  $V_G$  is the gate voltage, and  $V_T$  is threshold voltage. All measurements were performed at room temperature in atmosphere.

The photosensitivity ( $P$ ), photoresponsivity ( $R$ ), detectivity ( $D^*$ ), and external quantum efficiency ( $EQE$ ) were calculated by the four equations:

$$P = |I_{photo} - I_{dark}| / I_{dark} \quad (S3)$$

$$R = |I_{photo} - I_{dark}| / (SP_i) \quad (S4)$$

$$D^* = S^{1/2} R / (2eI_{dark})^{1/2} \quad (S5)$$

$$EQE = \frac{(I_{photo} / I_{dark})hc}{eP_i\lambda_{peak}} \quad (S6)$$

where  $I_{photo}$  and  $I_{dark}$  are the drain-source current measured under illumination and the drain-source current measured in dark,  $P_i$ ,  $S$ ,  $h$ ,  $c$ ,  $e$ , and  $\lambda_{peak}$  are the incident light intensity, the area of illuminated channel, the Planck constant, the light velocity, the unit of charge, and the excitation wavelength, respectively.

#### Synthesis of compound 2

Compound 1 (2.594 g, 8 mmol), bis(triphenylphosphine)palladium(II) dichloride (0.280 g, 0.4 mmol), and copper(I) iodide (0.152 g, 0.8 mmol) were successively added to the sealed tube, and dissolved in 30 mL tetrahydrofuran and 30 mL diisopropylamine under nitrogen atmosphere, then trimethylsilylacetylene (0.982 g, 10 mmol) was added. The mixed solution

was stirred at 80 °C for 12 hours. The reaction mixture was filtered by the sand plate filter which the silica gel is added and washed by dichloromethane under vacuum, then concentrated under reduced pressure. The concentrated filtrate eluted through a silica gel column with petroleum ether to afford compound 2 as light yellow oil (2.59 g, 95%). <sup>1</sup>H NMR (500 MHz, CD<sub>2</sub>Cl<sub>2</sub> δ): 7.34-7.30 (m, 6H), 7.14–7.11 (m, 6H), 6.96 (d, *J* = 8.0 Hz, 2H), 0.27 (s, 9H); MS (EI) *m/z*: 341.14.

### Synthesis of compound 3

Compound 2 (2.05 g, 6 mmol) was dissolved in 50 mL dichloromethane, and then tetrabutylammonium fluoride (9 mL, 1 mol L<sup>-1</sup> in THF) was added. The mixed solution was stirred at room temperature for 30 minutes, and then was poured into 100 mL water, and extracted with dichloromethane. The organic phase was dried with MgSO<sub>4</sub> and concentrated under reduced pressure. The concentrated filtrate eluted through a silica gel column with petroleum ether/dichloromethane (V/V = 10/1) to afford compound 3 as white powder (1.6 g, 99%). <sup>1</sup>H NMR (500 MHz, CD<sub>2</sub>Cl<sub>2</sub> δ): 7.36 (d, *J* = 8.6 Hz, 2H), 7.34-7.31 (m, 4H), 7.15-7.11 (m, 6H), 6.99 (d, *J* = 8.5 Hz, 2H), 3.11 (s, 1H). MS (EI) *m/z*: 269.05.

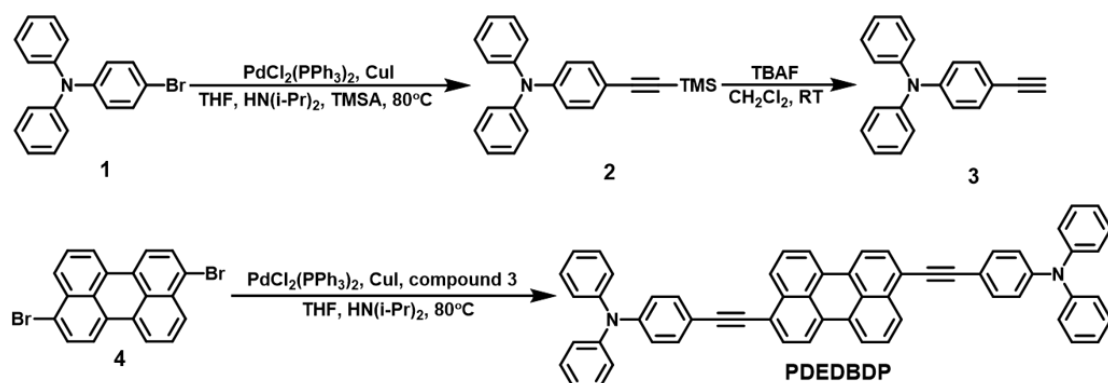

**Supplementary Scheme 1** Synthetic route of PDEDBDP.

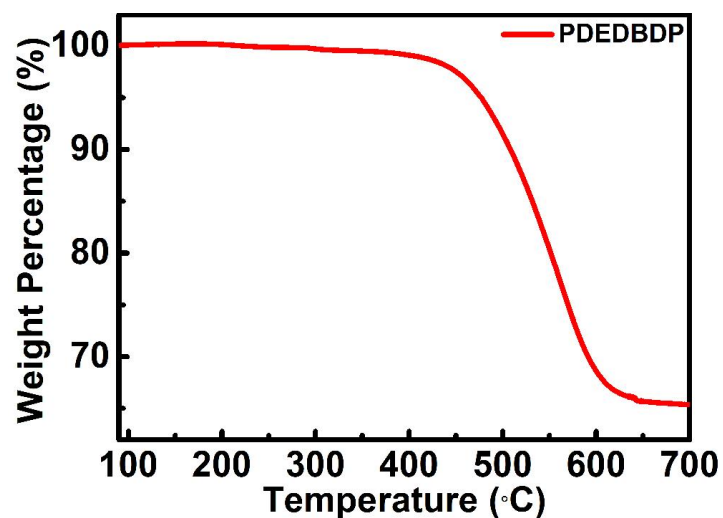

Supplementary Fig. 1 TGA of PDEDBDP.

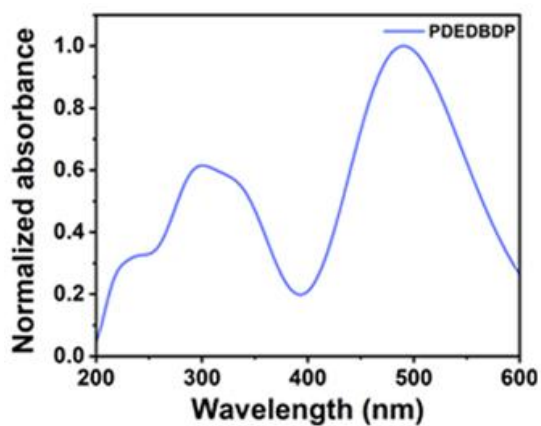

Supplementary Fig. 2 Normalized UV-vis spectra calculated by TDDFT: PDEDBDP.

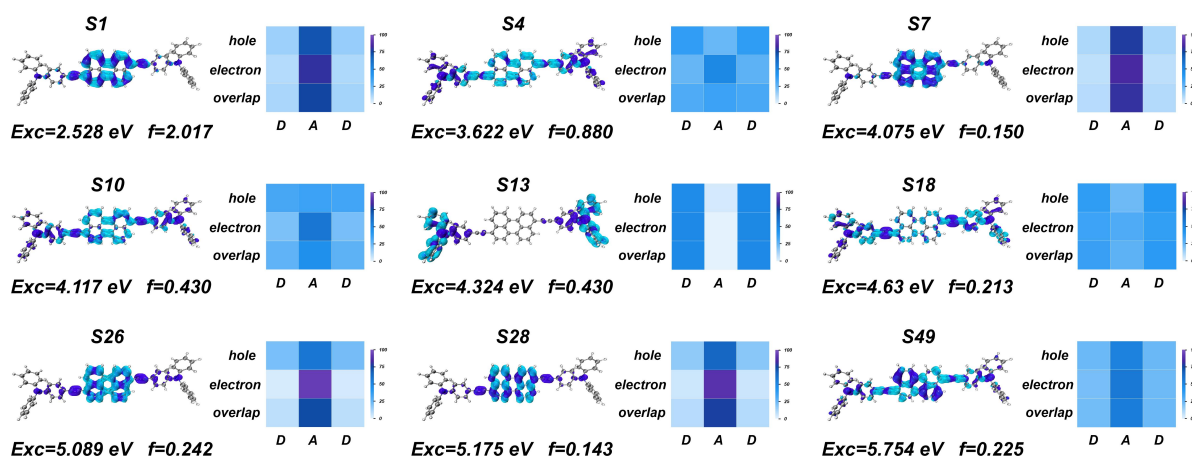

Supplementary Fig. 3 Distribution diagram of excited state wave functions, oscillator strength, and excitation energy for PDEDBDP.

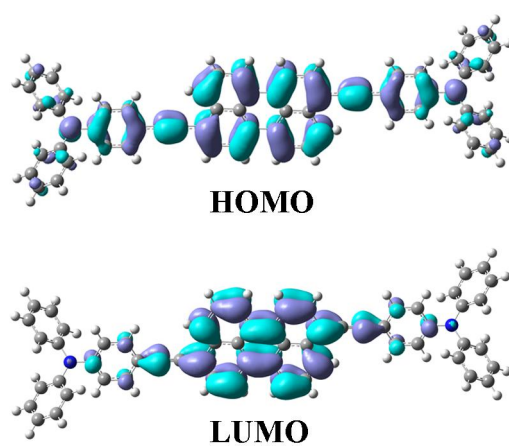

**Supplementary Fig. 4** HOMO and LUMO orbitals of PDEDBDP calculated by DFT.

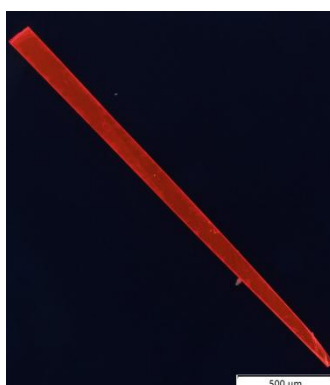

**Supplementary Fig. 5** PDEDBDP single crystals.

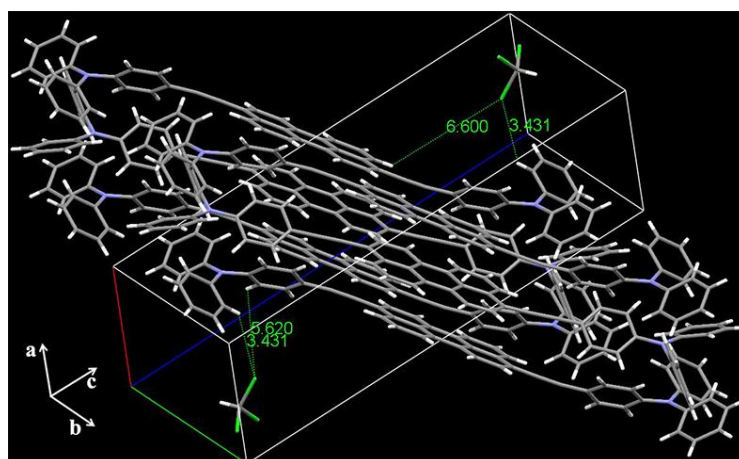

**Supplementary Fig. 6** The single-crystal packing of PDEDBDP single crystal.

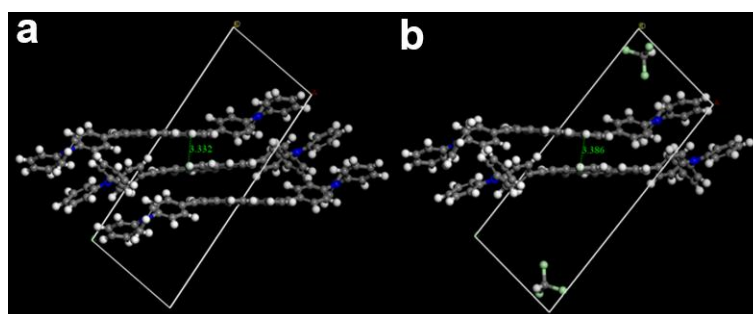

**Supplementary Fig. 7** The CP2K combined with PBE0 and Auxiliary Density Matrix Methods (ADMM) to perform geometric relaxation on single crystal structures: A) eliminating chloroforml and B) containing chloroforml.

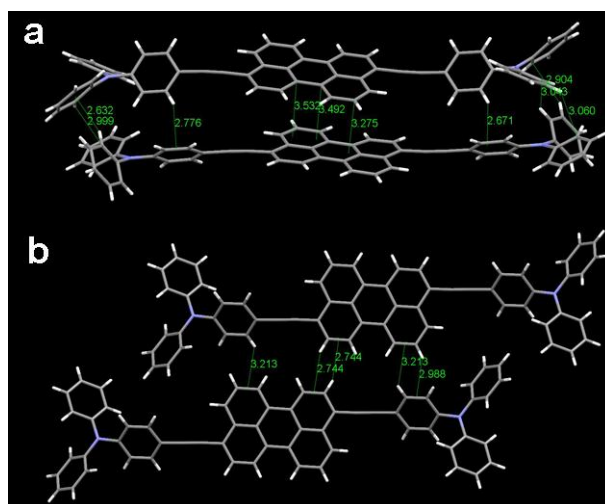

**Supplementary Fig. 8** The intermolecular interaction in PDEDBDP single crystal.

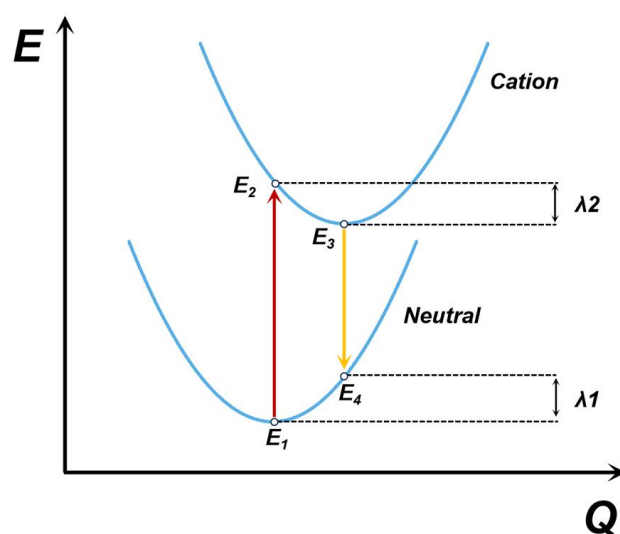

**Supplementary Fig. 9** The reorganization energy is calculated via the four-point method, where  $\lambda_1$  and  $\lambda_2$  correspond to energy differences along the potential energy surfaces of the neutral and cationic states respectively. The plot displays energy ( $E$ ) vertically versus geometric displacement ( $Q$ ) horizontally.

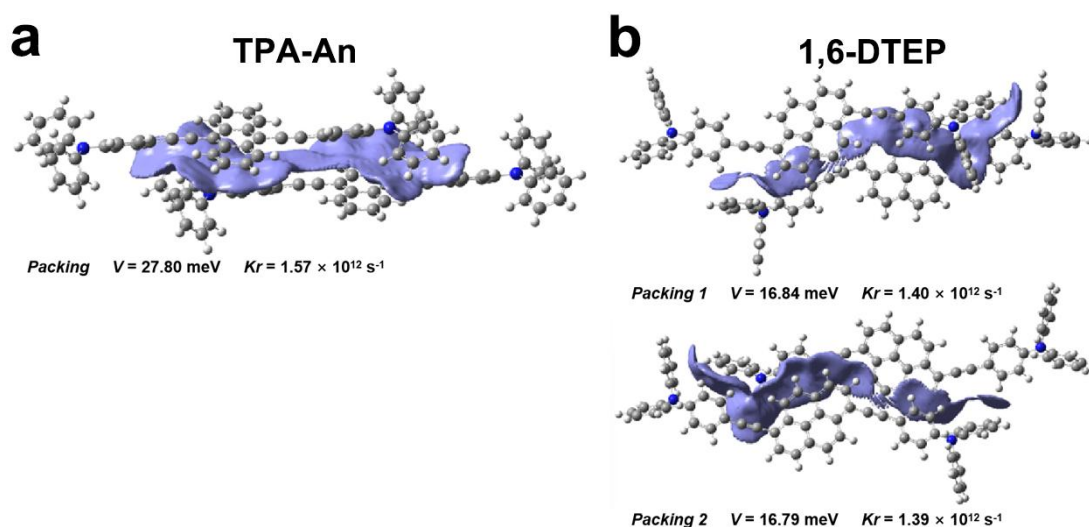

**Supplementary Fig. 10** The intermolecular interactions calculated by IGMH in TPA-An (a) and 1,6-DTEP (b) single crystals.

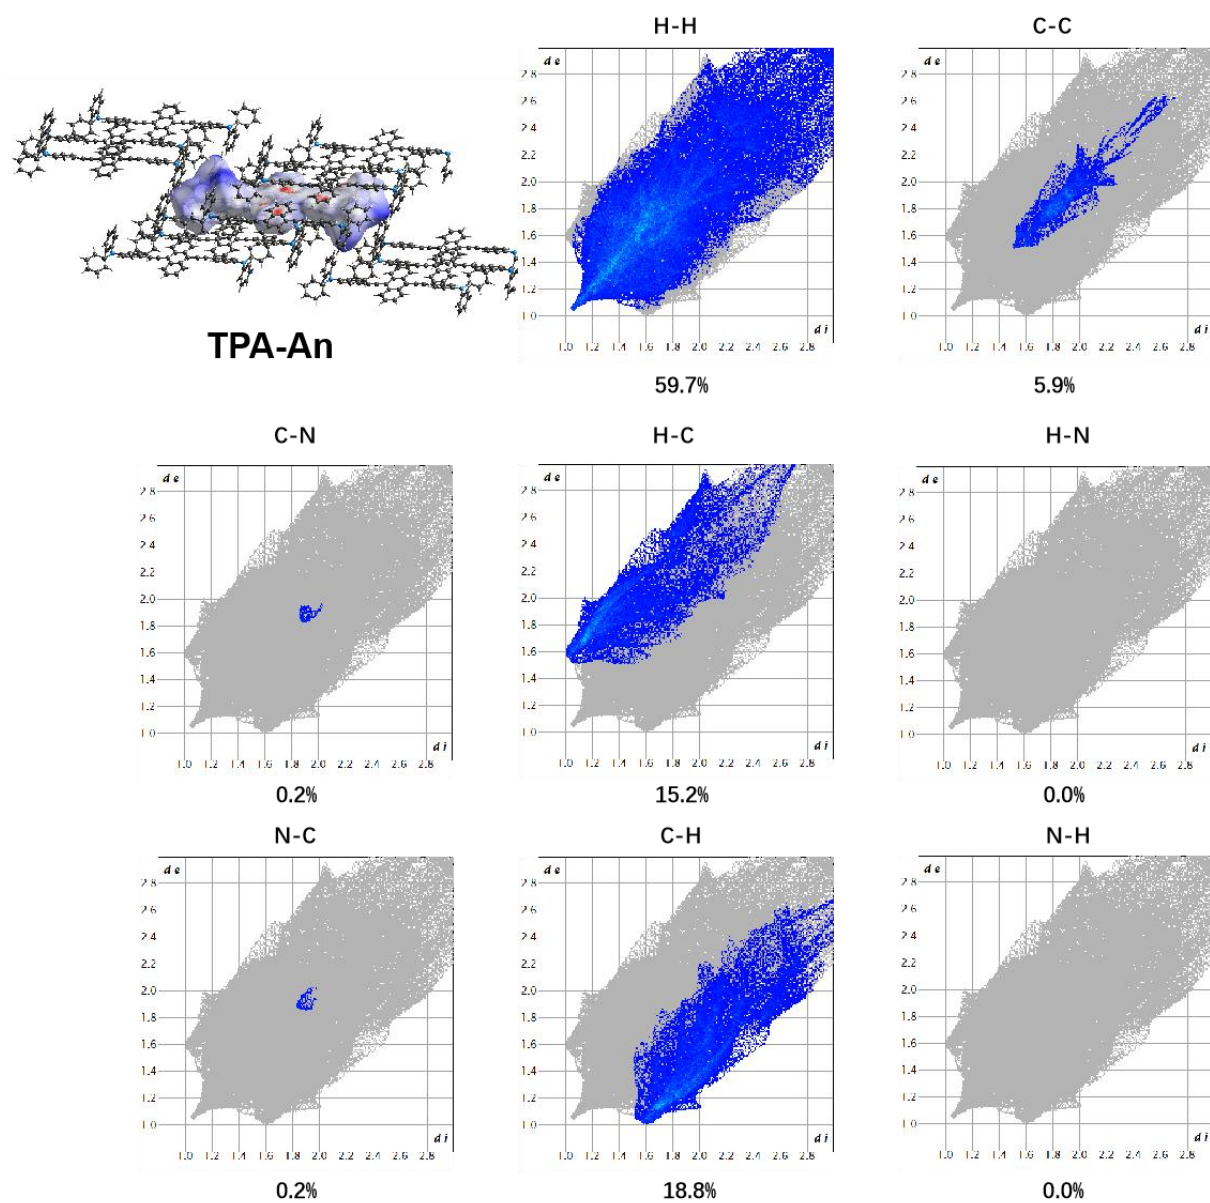

**Supplementary Fig. 11** Hirshfeld surface analysis for the contribution of the interactions between different elements in TPA-An single crystal.



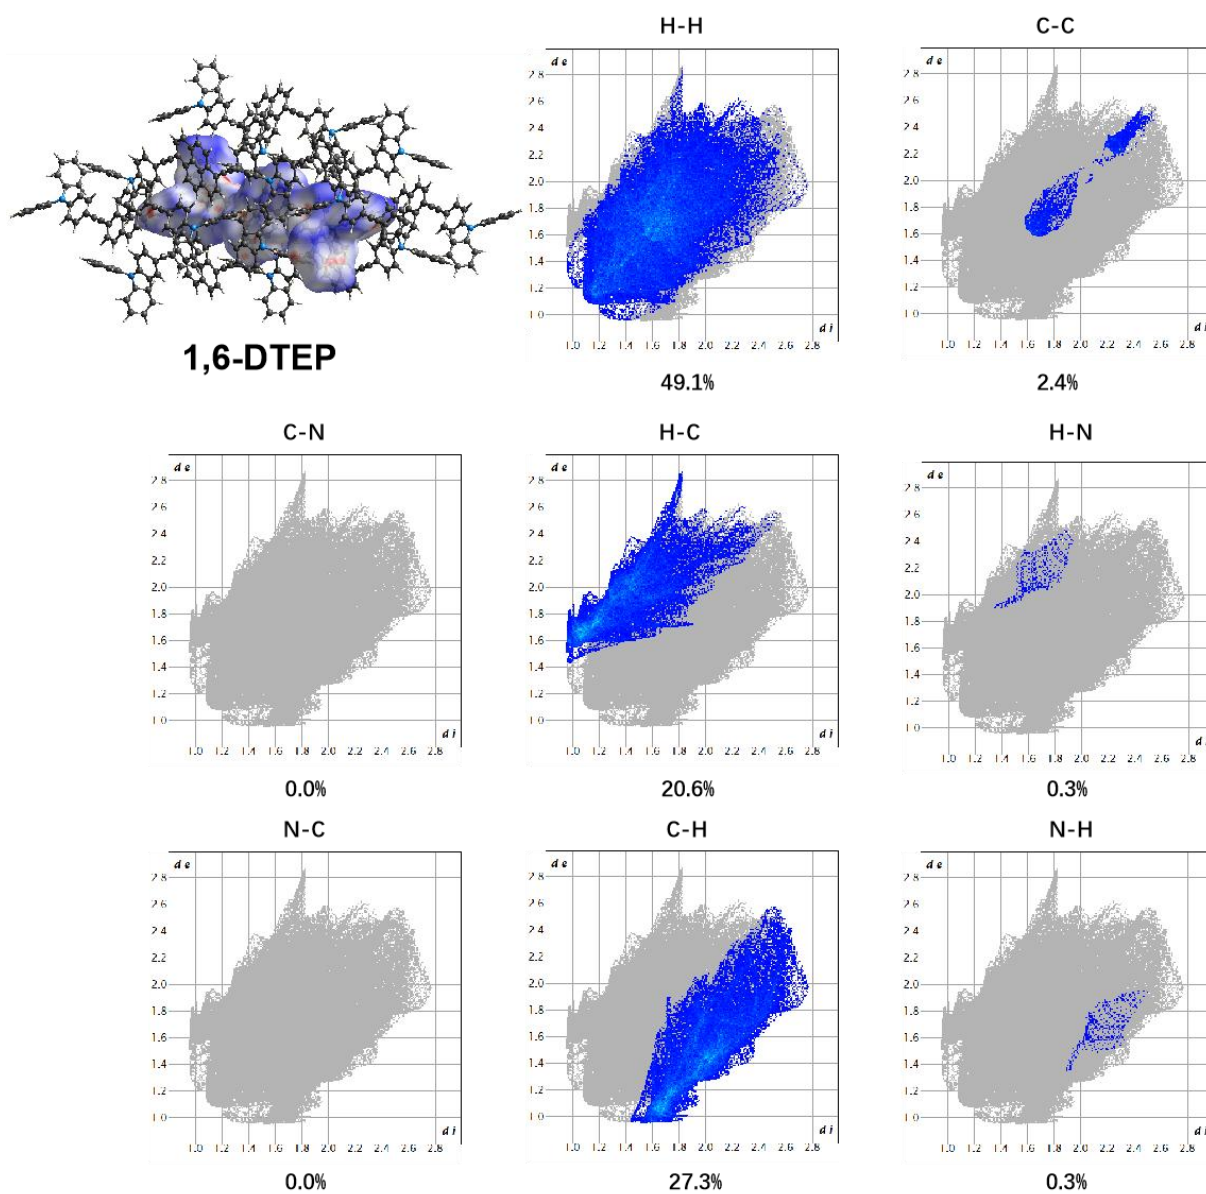

**Supplementary Fig. 12** Hirshfeld surface analysis for the contribution of the interactions between different elements in 1,6-DTEP single crystal.

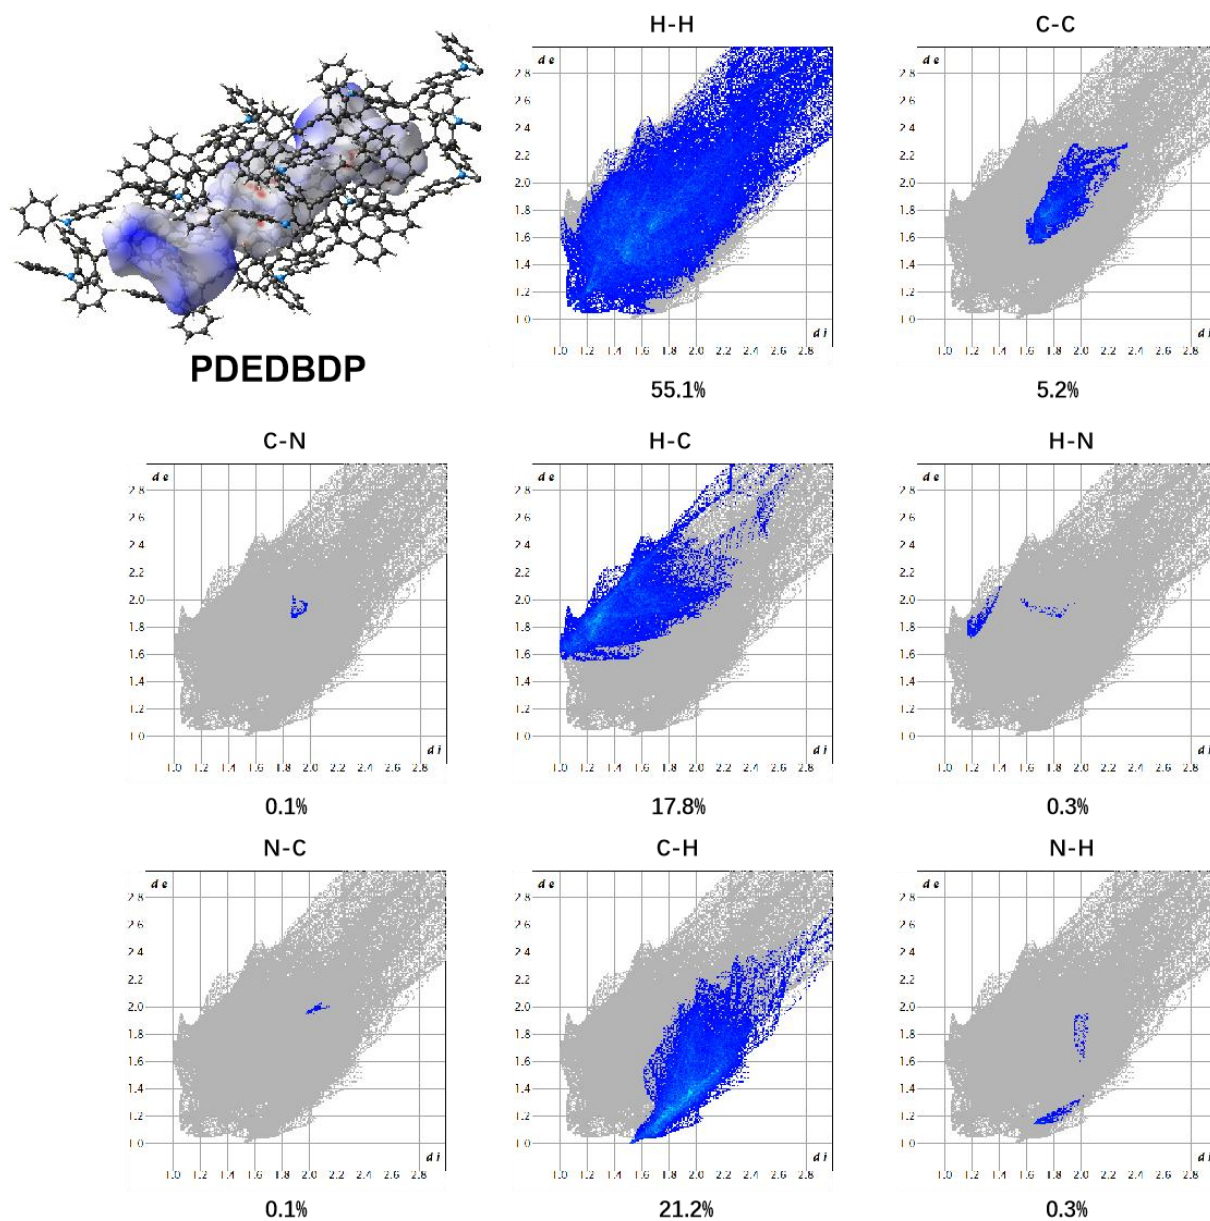

**Supplementary Fig. 13** Hirshfeld surface analysis for the contribution of the interactions between different elements in PDEDBDP single crystal.

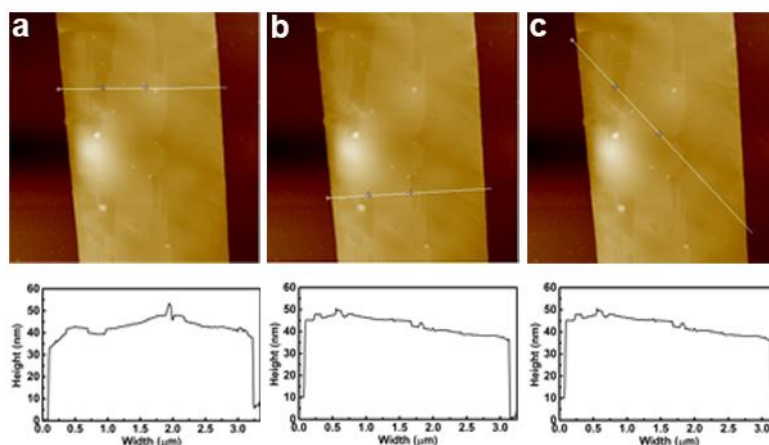

**Supplementary Fig. 14** a, b, c, AFM images of the fabricated PDEDBDP SC-OFETs.

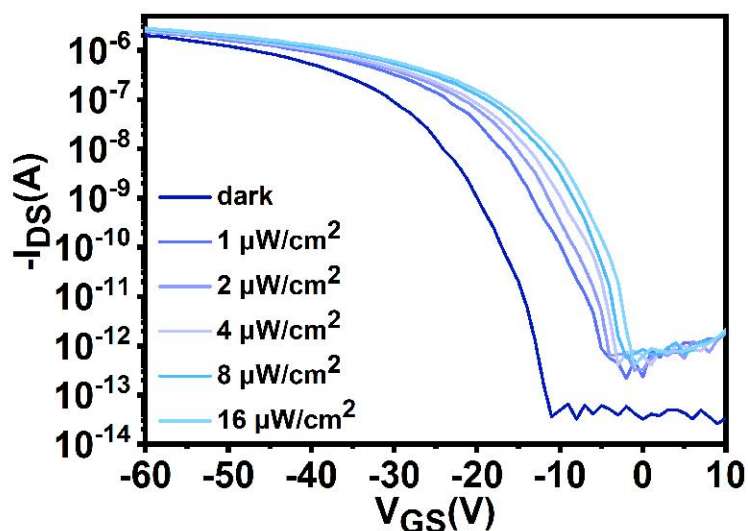

**Supplementary Fig. S15** The transfer characteristics of PDEDBDP phototransistors in darkness and under various white light illumination intensities.

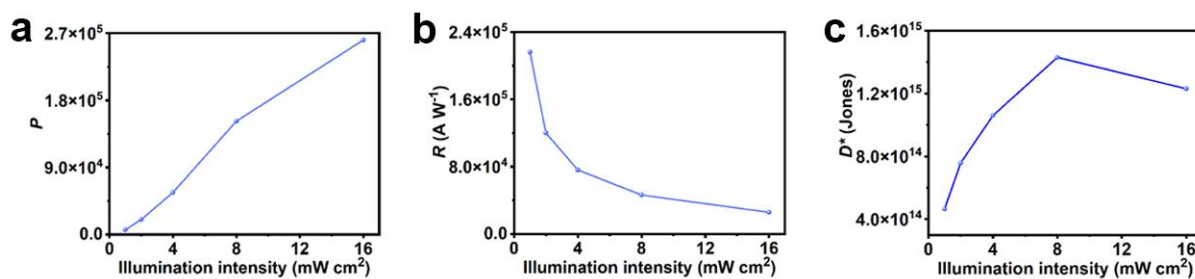

**Supplementary Fig. 16** The dependence of  $P_{max}$ ,  $R_{max}$ , and  $D^*_{max}$  (PDEDBDP device) under various white light illumination intensities.

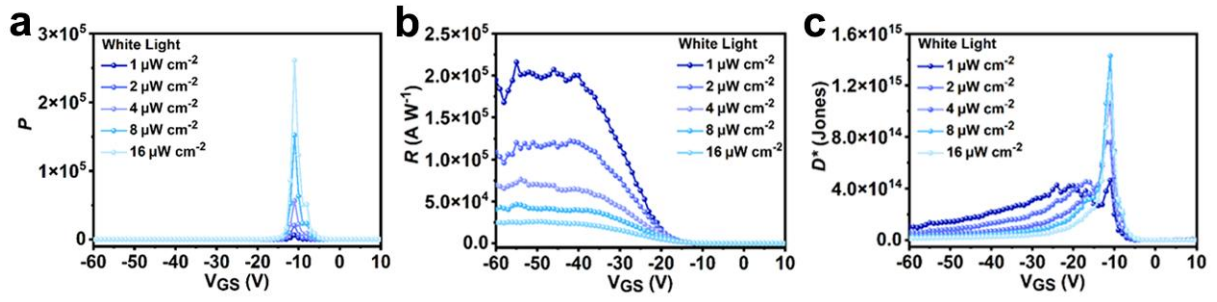

**Supplementary Fig. 17** The effect of  $V_{GS}$  modulation on PDEDBDP device performance under various white light illumination intensities:  $P$ ,  $R$ , and  $D^*$ .

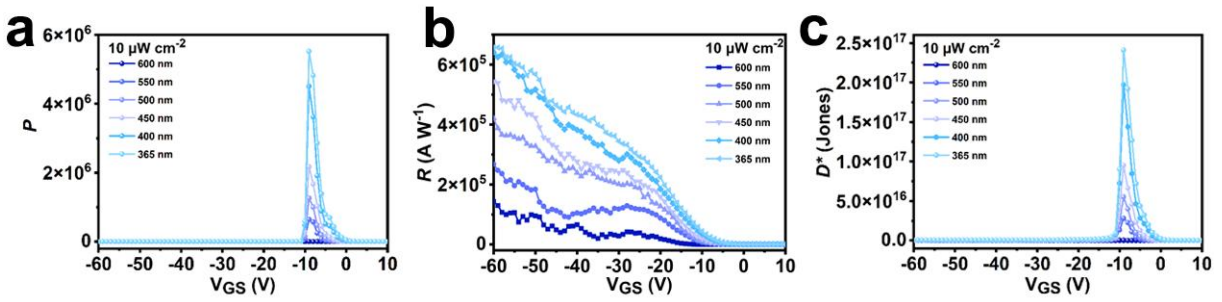

**Supplementary Fig. 18** The effect of  $V_{GS}$  modulation on PDEDBDP device performance under  $10 \mu\text{W cm}^{-2}$  different wavelength illumination:  $P$ ,  $R$ , and  $D^*$ .

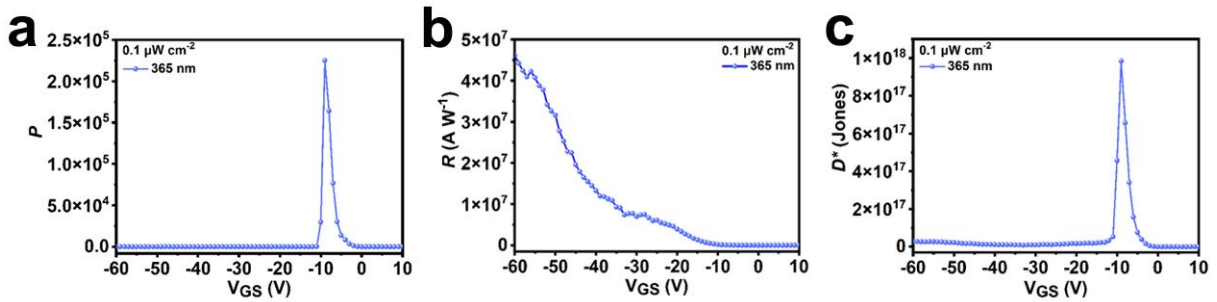

**Supplementary Fig. 19** The effect of  $V_{GS}$  modulation on PDEDBDP device performance under  $0.1 \mu\text{W cm}^{-2}$  different wavelength illumination:  $P$ ,  $R$ , and  $D^*$ .

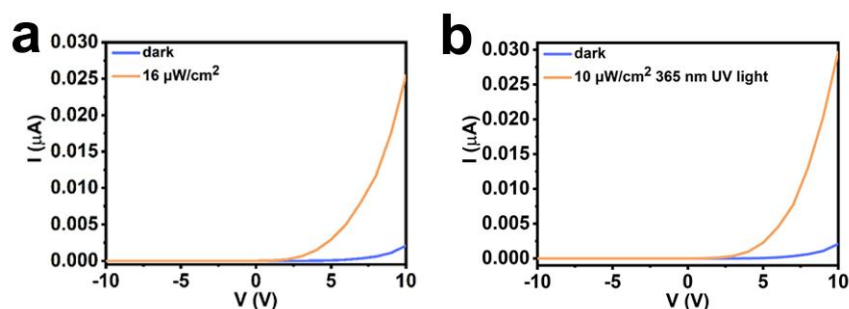

**Supplementary Fig. 20 a**, The  $I$ - $V$  curves of photodiodes based on PDEDBDP micro/nanometersized single crystal in dark and under  $16 \mu\text{W}/\text{cm}^2$  white light illumination. **b**, The  $I$ - $V$  curve of photodiodes based on PDEDBDP micro/nanometersized single crystal in dark and under  $10 \mu\text{W}/\text{cm}^2$  365 nm light illumination.

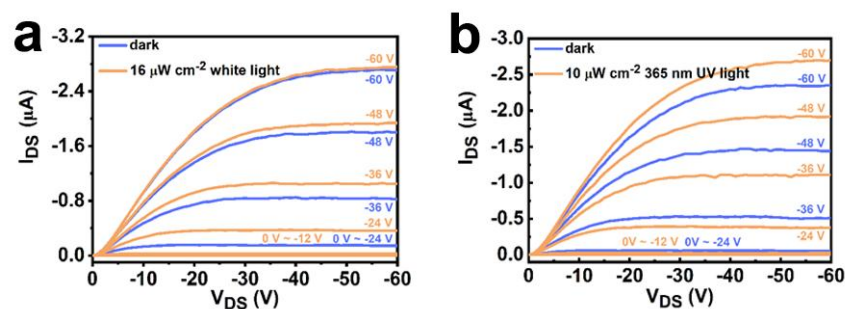

**Supplementary Fig. 21 a**, The output characteristics of the PDEDBDP SC-OPTs in darkness and under  $16 \mu\text{W}/\text{cm}^2$  white light illumination. **b**, The output characteristics of the PDEDBDP SC-OPTs in darkness and under  $10 \mu\text{W}/\text{cm}^2$  365 nm UV light illumination.

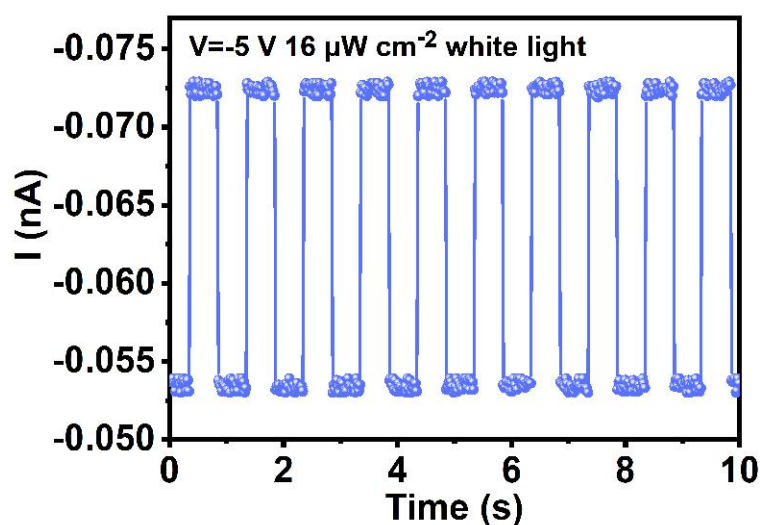

**Supplementary Fig. 22** Temporal photoresponse of PDEDBDP device (ten cycles) under  $16 \mu\text{W}/\text{cm}^2$  white light illumination.



**Supplementary Table S1.** HOMO levels, LUMO levels and optical bandgaps of PDEDBDP.

| Compound | HOMO (eV) | LUMO (eV) | $E_g^{opt}$ (eV) |
|----------|-----------|-----------|------------------|
| PDEDBDP  | -5.19     | -3.07     | 2.12             |

**Supplementary Table S2.** The reorganization energy of TPA-An, 1,6-DTEP, and PDEDBDP single crystals.

| Compound | $E_\lambda$ (eV) |
|----------|------------------|
| TPA-An   | 0.284            |
| 1,6-DTEP | 0.208            |
| PDEDBDP  | 0.213            |

**Supplementary Table S3.** PDEDBDP SC-OFET performances.

| Compound | $\mu_{max} (\mu_{avg})$ [ $\text{cm}^2 \text{V}^{-1} \text{s}^{-1}$ ] | $I_{on} / I_{off}$  | $V_{Th}$ [V] |
|----------|-----------------------------------------------------------------------|---------------------|--------------|
| PDEDBDP  | 4.33 (1.53)                                                           | $10^9 \sim 10^{10}$ | -2 ~ -10     |

**Supplementary Table S4.** PDEDBDP SC-OPT performances under various white light illumination intensities.

| Compound | Light       | $P_i$ ( $\mu\text{W cm}^{-2}$ ) | $P$                | $R$ ( $\text{A W}^{-1}$ ) | $D^*$ (Jones)         |
|----------|-------------|---------------------------------|--------------------|---------------------------|-----------------------|
| PDEDBDP  | white light | 1                               | $6.19 \times 10^3$ | $2.16 \times 10^5$        | $4.65 \times 10^{14}$ |
|          | white light | 2                               | $2.01 \times 10^4$ | $1.20 \times 10^5$        | $7.58 \times 10^{14}$ |
|          | white light | 4                               | $5.64 \times 10^4$ | $7.61 \times 10^4$        | $1.06 \times 10^{15}$ |
|          | white light | 8                               | $1.52 \times 10^5$ | $4.64 \times 10^4$        | $1.43 \times 10^{15}$ |
|          | white light | 16                              | $2.61 \times 10^5$ | $2.59 \times 10^4$        | $1.23 \times 10^{15}$ |

**Supplementary Table S5.** PDEDBDP SC-OPT performances under 10  $\mu\text{W cm}^{-2}$  different wavelength illumination.

| Compound | Light  | $P_i$<br>( $\mu\text{W cm}^{-2}$ ) | $P$                | $R$ ( $\text{A W}^{-1}$ ) | $D^*$ (Jones)         | $EQE$ (%)          |
|----------|--------|------------------------------------|--------------------|---------------------------|-----------------------|--------------------|
| PDEDBDP  | 365 nm | 10                                 | $5.52 \times 10^6$ | $6.58 \times 10^5$        | $2.41 \times 10^{17}$ | $1.54 \times 10^8$ |
|          | 400 nm | 10                                 | $4.51 \times 10^6$ | $6.41 \times 10^5$        | $1.97 \times 10^{17}$ | $1.13 \times 10^8$ |
|          | 450 nm | 10                                 | $2.17 \times 10^6$ | $5.44 \times 10^5$        | $9.49 \times 10^{16}$ | $5.73 \times 10^7$ |
|          | 500 nm | 10                                 | $1.26 \times 10^6$ | $4.21 \times 10^5$        | $5.50 \times 10^{16}$ | $2.94 \times 10^7$ |
|          | 550 nm | 10                                 | $6.41 \times 10^5$ | $2.68 \times 10^5$        | $2.80 \times 10^{16}$ | $1.52 \times 10^7$ |
|          | 600 nm | 10                                 | $3.08 \times 10^5$ | $1.43 \times 10^5$        | $1.40 \times 10^{14}$ | $1.45 \times 10^5$ |
